# Supplementary material for: High-temperature water gas shift reaction on Ni–Cu/CeO2 catalysts: effect of ceria nanocrystal size on carboxylate formation
Source: Royal Society of Chemistry journal article supplement (doi:10.1039/c5cy01932j), 2016-01-01
Supplement: c5cy01932j1.pdf [file c5cy01932j1.pdf]

## **High Temperature-Water Gas Shift on Ni-Cu/CeO<sub>2</sub> Catalysts: Effect of Ceria Nano-Crystal Size on Carboxylate Formation**

*E.T Saw, U. Oemar, M.L. Ang, K. Hidajat and S. Kawi\**

Department of Chemical and Bio-molecular Engineering, National University of Singapore, 4  
Engineering Drive 4, Singapore 117585

\*To whom correspondence should be addressed

Address: Department of Chemical and Biomolecular Engineering, National University of  
Singapore, 4 Engineering Drive 4, Singapore 117585

Telephone: (65) 6516 6312; Fax: (65) 6779 1936

E-Mail address: [chekawis@nus.edu.sg](mailto:chekawis@nus.edu.sg). (S. Kawi)

## SUPPORTING INFORMATION

### (i) *Particle Size Distribution of CeO<sub>2</sub> (1)*

Figure S1 displays the particle size distribution of CeO<sub>2</sub> (1) prepared using the concentration of cerium-nitrate as catalyst precursors of 13.5mM and 2.25g of PVP360K dissolved in deionized water and placed into oven at 140°C for 12 hours. Calcination in air at 700°C for 2hours and the sizes are ranged from 150 to 350nm where the high frequencies of particles sizes are shown within 275-300 nm and the average ceria particle size is 284 nm.

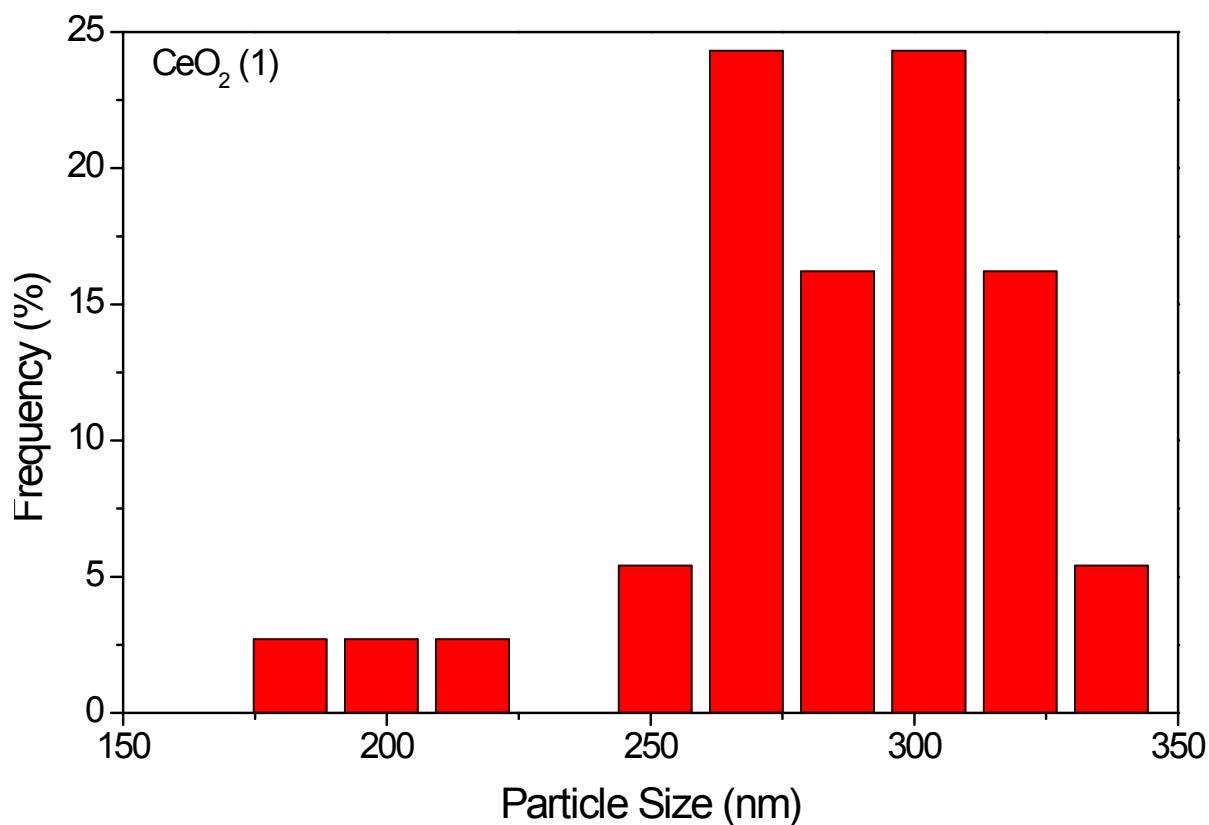

**Figure S1.** Particle Size Distribution of CeO<sub>2</sub> (1)

**(ii) Particle Size Distribution of CeO<sub>2</sub> (2)**

Figure S2 displays the particle size distribution of CeO<sub>2</sub> (2) prepared using the concentration of cerium-nitrate as catalyst precursors of 22.5mM and 2.25g of PVP360K dissolved in deionized water and put into 140°C for 48hours. Calcination in air at 700°C for 2hours and the sizes are ranged from 400 to 800nm where the high frequencies of particle sizes are shown within 500-600 nm and the average ceria particle size is 550 nm.

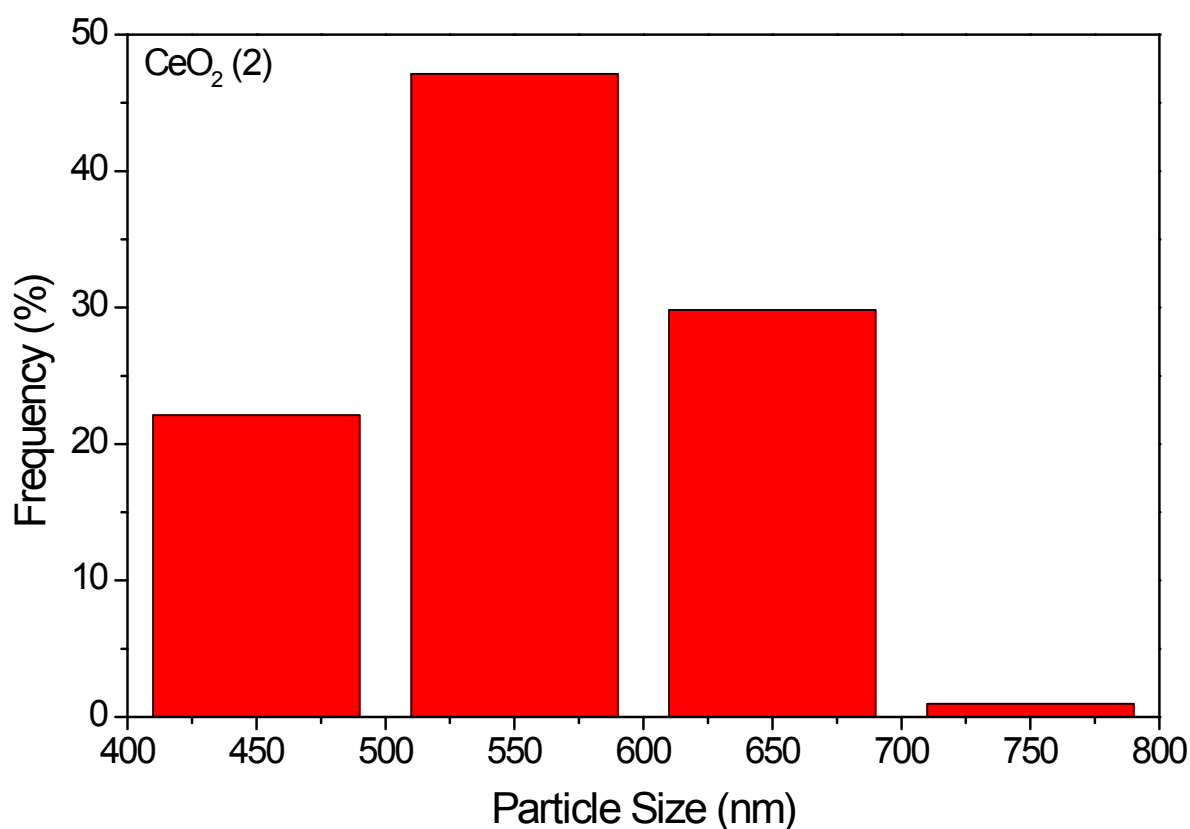

**Figure S2.** Particle Size Distribution of CeO<sub>2</sub> (2)

**(iii) Particle Size Distribution of CeO<sub>2</sub> (3)**

Figure S3 displays the particle size distribution of CeO<sub>2</sub> (2) prepared using the concentration of cerium-nitrate as catalyst precursors of 22.5mM and 2.25g of PVP360K dissolved in deionized water and put into 140°C for 96 hours. Calcination in air at 700°C for 2hours and the sizes are ranged from 800 to 1200nm where the high frequency of particle sizes are shown within 900-1000nm and the average ceria particle size is 946 nm.

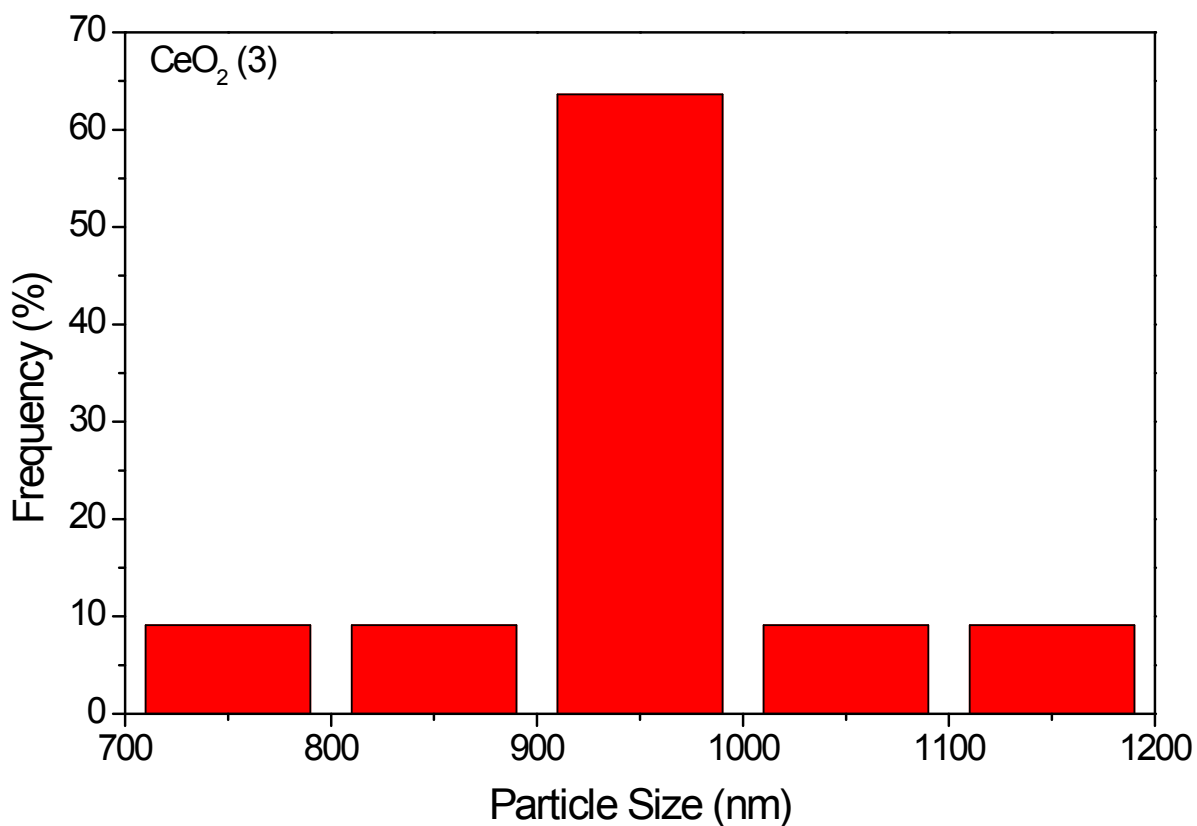

**Figure S3.** Particle Size Distribution of CeO<sub>2</sub> (3)

**(iv)  $N_2O$  decomposition over reduced  $CeO_2$  (1)**

Figure S4 displays the  $TPR_1$  and  $TPR_2$  profiles obtained during  $N_2O$  decomposition technique.  $TPR_1$  is carried out freshly calcined  $CeO_2$  (1) support upto  $700^\circ C$  for 1 h. Whereas,  $TPR_2$  is carried out after  $N_2O$  pulse at  $80^\circ C$ . The amount of  $H_2$  consumed during  $TPR_2$  is  $14.08 \mu mol/g$ . This result shows about 0.8% in 11.4% of 5Ni-5Cu/ $CeO_2$  (1) catalyst's dispersion is obtained from  $CeO_2$  (1) support.

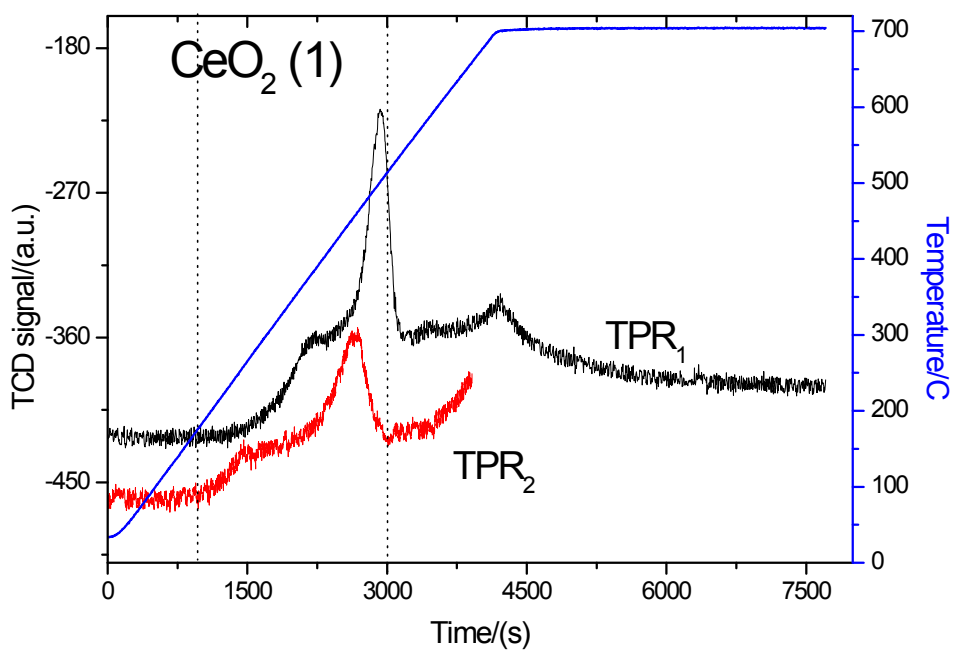

**Figure S4.**  $H_2$ -TPR's during  $N_2O$  decomposition technique over reduced  $CeO_2$  (1)

(v) *N<sub>2</sub>O decomposition over reduced CeO<sub>2</sub> (2)*

Figure S5 displays the TPR<sub>1</sub> and TPR<sub>2</sub> profiles obtained during N<sub>2</sub>O decomposition technique. TPR<sub>1</sub> is carried out freshly calcined CeO<sub>2</sub> (2) support upto 700°C for 1 h. Whereas, TPR<sub>2</sub> is carried out after N<sub>2</sub>O pulse at 80°C. The amount of H<sub>2</sub> consumed during TPR<sub>2</sub> is 3.93 μmol/g. This result shows about 0.2% in 12.3% of 5Ni-5Cu/CeO<sub>2</sub> (2) catalyst's dispersion is obtained from CeO<sub>2</sub> (2) support.

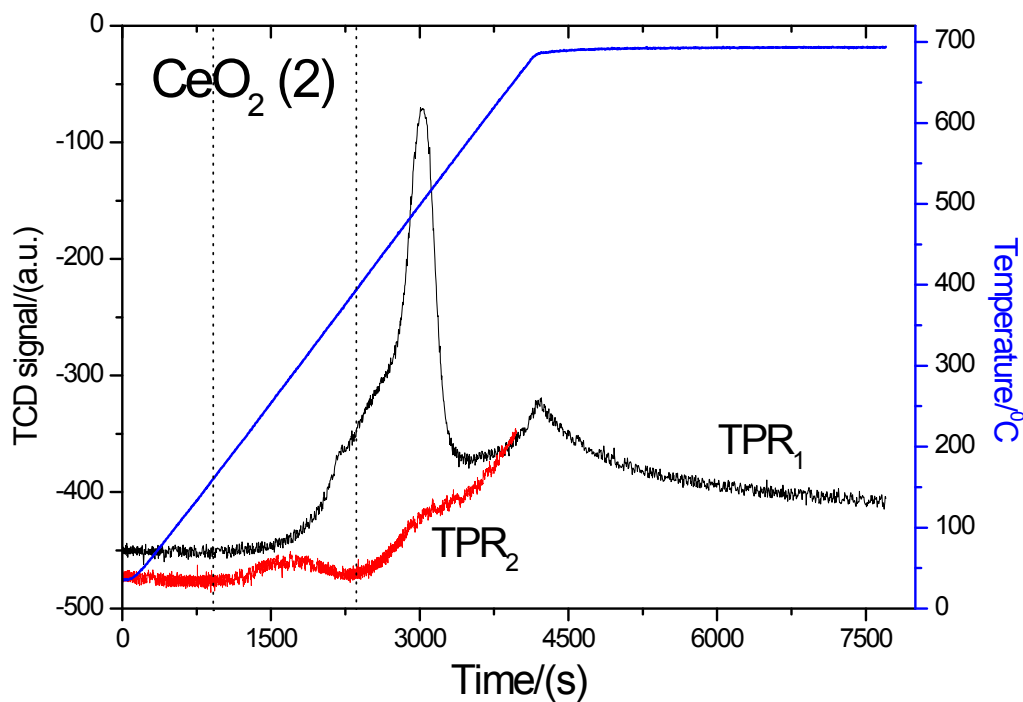

**Figure S5.** H<sub>2</sub>-TPR's during N<sub>2</sub>O decomposition technique over reduced CeO<sub>2</sub> (2)

(vi) *N<sub>2</sub>O decomposition over reduced CeO<sub>2</sub> (3)*

Figure S6 displays the TPR<sub>1</sub> and TPR<sub>2</sub> profiles obtained during N<sub>2</sub>O decomposition technique. TPR<sub>1</sub> is carried out freshly calcined CeO<sub>2</sub> (3) support upto 700°C for 1 h. Whereas, TPR<sub>2</sub> is carried out after N<sub>2</sub>O pulse at 80°C. The amount of H<sub>2</sub> consumed during TPR<sub>2</sub> is 8.23 μmol/g. This result shows about 0.4% in 15.1% of 5Ni-5Cu/CeO<sub>2</sub> (3) catalyst's dispersion is obtained from CeO<sub>2</sub> (3) support.

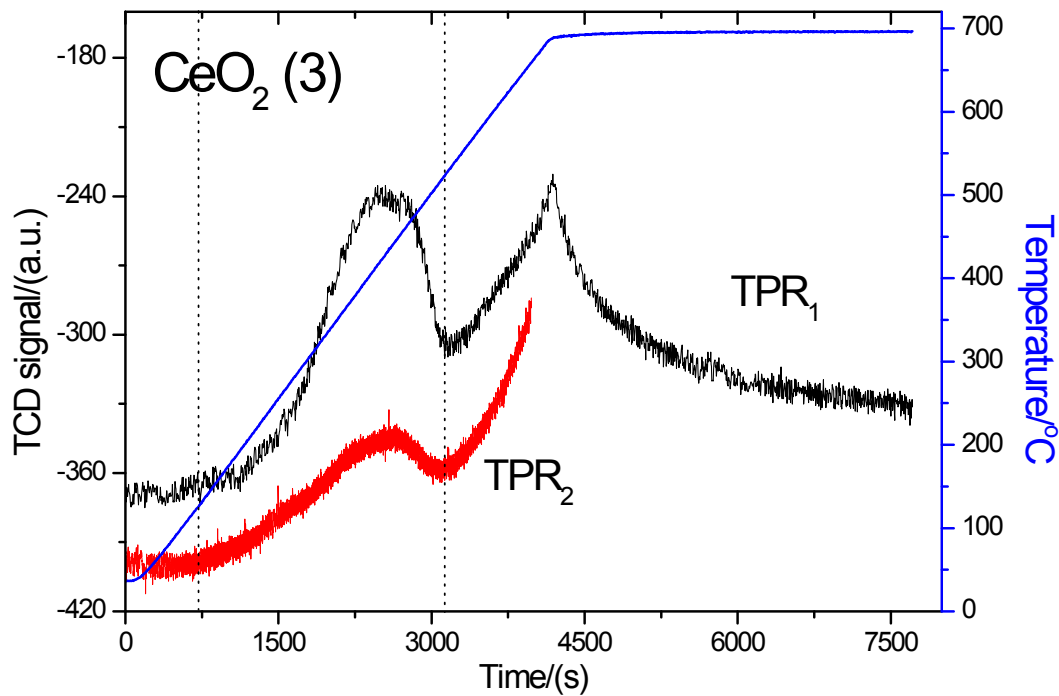

**Figure S6.** H<sub>2</sub>-TPR's during N<sub>2</sub>O decomposition technique over reduced CeO<sub>2</sub> (3)

**(vii) Bimetallic Particle Size of supported 5Ni5Cu/CeO<sub>2</sub> (1)**

Figure S7 displays the particle size distribution of Ni-Cu bimetallic particle size prepared after reduction of 5Ni5Cu/CeO<sub>2</sub> (1) at 450°C. The bimetallic sizes are ranged from 10-35 nm where the high frequencies of particle sizes are shown within 15-25 nm and the average of bimetallic particle size is 22.4nm.

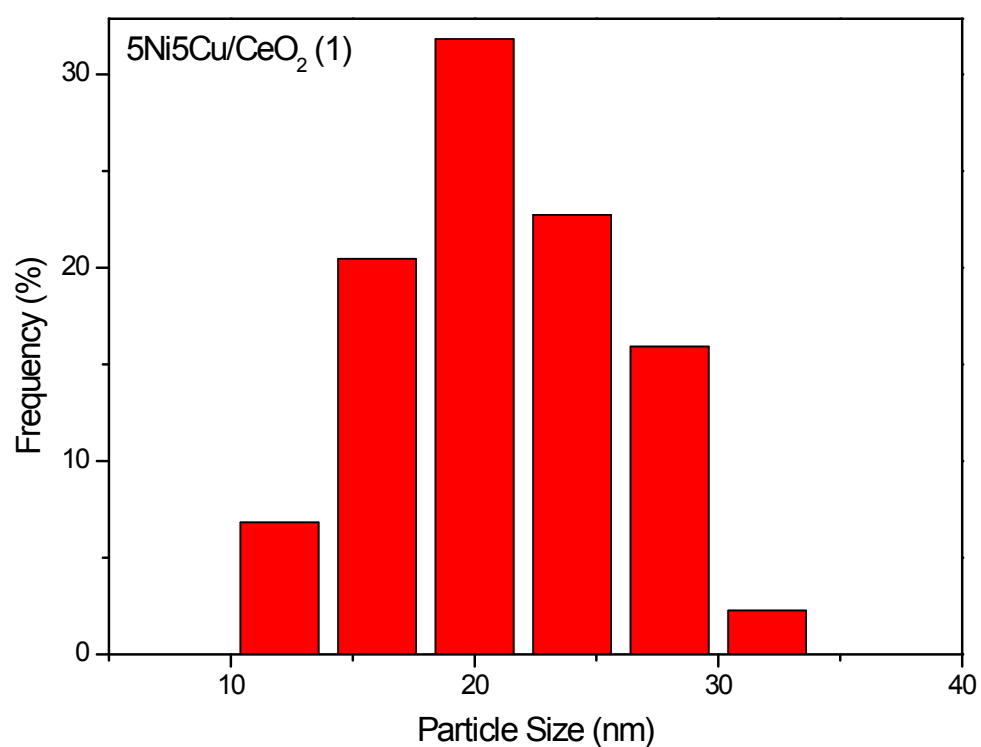

**Figure S7.** Particle Size Distribution of 5Ni5Cu/CeO<sub>2</sub> (1)



**(viii) Bimetallic Particle Size of supported 5Ni5Cu/CeO<sub>2</sub> (2)**

Figure S8 displays the particle size distribution of Ni-Cu bimetallic particle size prepared after reduction of 5Ni5Cu/CeO<sub>2</sub> (2) at 450°C. The bimetallic sizes are ranged from 10-60 nm where the high frequencies of particle sizes are shown within 20-35 nm and the average particle size is 29.4 nm.

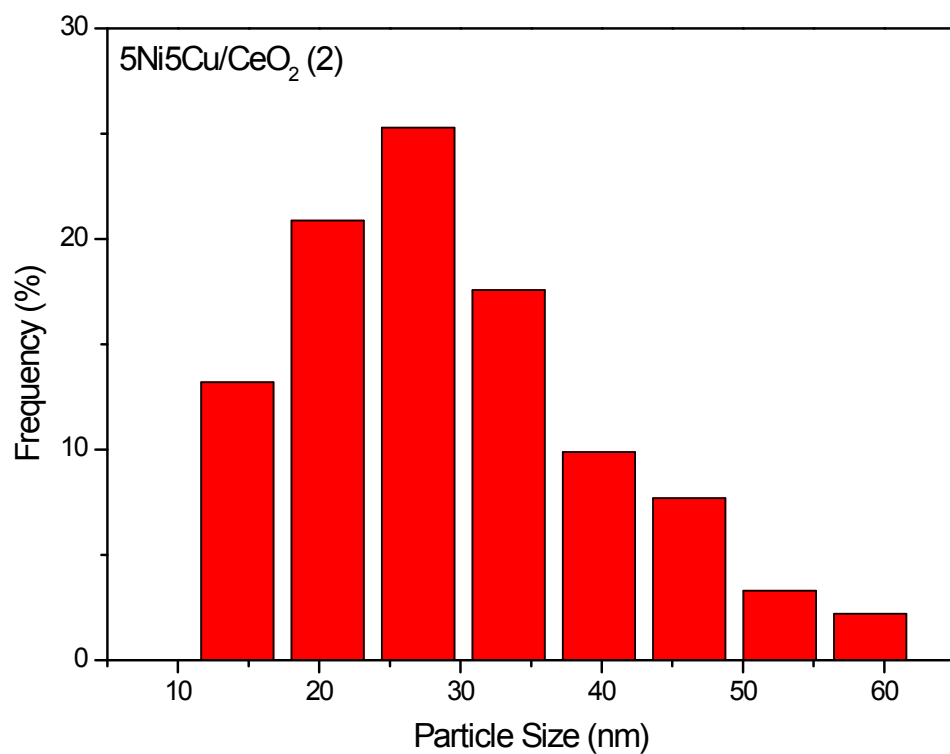

**Figure S8.** Particle Size Distribution of 5Ni5Cu/CeO<sub>2</sub> (2)

**(ix) Bimetallic Particle Size of supported 5Ni5Cu/CeO<sub>2</sub> (3)**

Figure S9 displays the particle size distribution of Ni-Cu bimetallic particle size prepared after reduction of 5Ni5Cu/CeO<sub>2</sub> (3) at 450°C. The bimetallic sizes are ranged from where the high frequencies of particle sizes are shown within 20-35 nm and the average particle size is 28.3 nm.

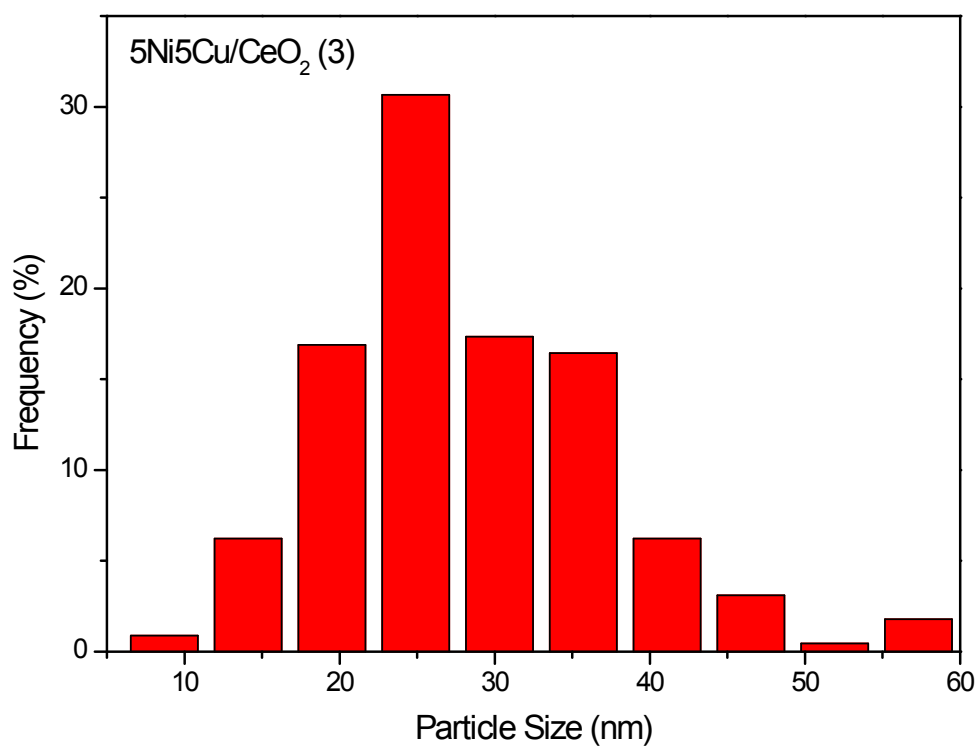

**Figure S9.** Particle Size Distribution of 5Ni5Cu/CeO<sub>2</sub> (3)

(x) ***Bimetallic Particle Size of spent catalyst (5Ni5Cu/CeO<sub>2</sub> (3)) for 30 hours of catalytic stability test***

Figure S10 displays the particle size distribution of Ni-Cu bimetallic particle size prepared after the stability test of 5Ni5Cu/CeO<sub>2</sub> (3) at 450°C. The bimetallic sizes are ranged from 20-60 nm where the high frequencies of particle sizes are shown within 25-35 nm and the average of the bimetallic particle size is 33.9 nm.

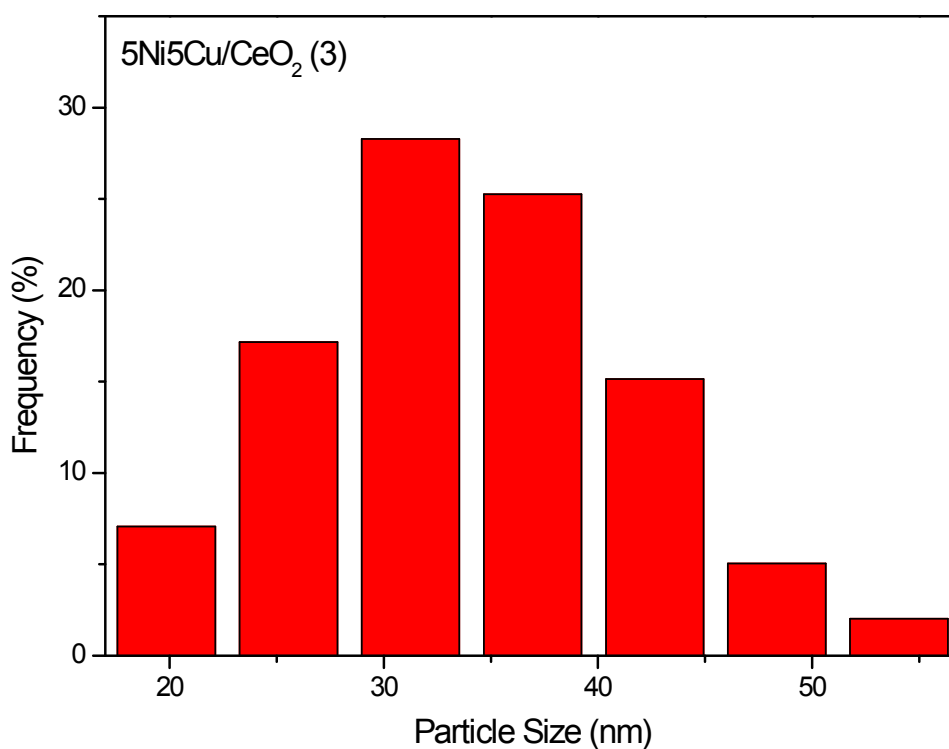

**Figure S10.** Particle Size Distribution of spent 5Ni5Cu/CeO<sub>2</sub> (3)
